# Supplementary material for: Single and double intramolecular proton transfers in the electronically excited state of flavone derivatives
Source: Royal Society of Chemistry journal article supplement (doi:10.1039/c5ra13912k), 2015-01-01
Supplement: c5ra13912k1.pdf [file c5ra13912k1.pdf]

## Supporting Information

### Single and double intramolecular proton transfers in the electronically excited state of flavone derivatives

#### Authors

*I. E. Serdiuk<sup>a,b\*</sup> and A. D. Roshal<sup>b</sup>*

#### Affiliations

<sup>a</sup>Faculty of Chemistry, University of Gdańsk, Gdańsk, 80-308 Poland

<sup>b</sup>Institute of Chemistry, V. N. Karazin Kharkiv National University, Kharkiv, 61022 Ukraine

\*Corresponding author

## Contents

|                                                                                                                                                             |    |
|-------------------------------------------------------------------------------------------------------------------------------------------------------------|----|
| Figure S1. Phosphorescence spectra of 1d and 2d in methylcyclohexane at 77 K                                                                                | 3  |
| Figure S2. Steady-state 3D fluorescence emission-excitation spectra and their projections in methylcyclohexane at 298 K                                     | 4  |
| Figure S3. Absorption spectra at 298 K, steady-state fluorescence excitation spectra recorded at the emission maxima at 298 K and 77 K in methylcyclohexane | 6  |
| Figure S4. <sup>1</sup> H-NMR of compound 1a in CDCl <sub>3</sub> .                                                                                         | 7  |
| Figure S5. MALDI-TOF mass spectrum of compound 1a.                                                                                                          | 7  |
| Figure S6. <sup>1</sup> H-NMR of compound 1b in CDCl <sub>3</sub> .                                                                                         | 8  |
| Figure S7. MALDI-TOF mass spectrum of compound 1b.                                                                                                          | 8  |
| Figure S8. <sup>1</sup> H-NMR of compound 1c in CDCl <sub>3</sub> .                                                                                         | 9  |
| Figure S9. MALDI-TOF mass spectrum of compound 1c.                                                                                                          | 9  |
| Figure S10. <sup>1</sup> H-NMR of compound 1d in CDCl <sub>3</sub> .                                                                                        | 10 |
| Figure S11. MALDI-TOF mass spectrum of compound 1d.                                                                                                         | 10 |
| Figure S12. <sup>1</sup> H-NMR of compound 1e in CDCl <sub>3</sub> .                                                                                        | 11 |
| Figure S13. MALDI-TOF mass spectrum of compound 1e.                                                                                                         | 11 |
| Figure S14. <sup>1</sup> H-NMR of compound 2a in DMSO- <i>d</i> <sub>6</sub> .                                                                              | 12 |
| Figure S15. MALDI-TOF mass spectrum of compound 2a.                                                                                                         | 12 |
| Figure S16. <sup>1</sup> H-NMR of compound 2b in DMSO- <i>d</i> <sub>6</sub> .                                                                              | 13 |
| Figure S17. MALDI-TOF mass spectrum of compound 2b.                                                                                                         | 13 |
| Figure S18. <sup>1</sup> H-NMR of compound 2c in CDCl <sub>3</sub> .                                                                                        | 14 |
| Figure S19. MALDI-TOF mass spectrum of compound 2c.                                                                                                         | 14 |
| Figure S20. <sup>1</sup> H-NMR of compound 2d in CDCl <sub>3</sub> .                                                                                        | 15 |
| Figure S21. MALDI-TOF mass spectrum of compound 2d.                                                                                                         | 15 |
| Figure S22. <sup>1</sup> H-NMR of compound 5a in DMSO- <i>d</i> <sub>6</sub> .                                                                              | 16 |
| Figure S23. MALDI-TOF mass spectrum of compound 5a.                                                                                                         | 16 |
| Figure S24. <sup>1</sup> H-NMR of compound 6a in DMSO- <i>d</i> <sub>6</sub> .                                                                              | 17 |
| Figure S25. MALDI-TOF mass spectrum of compound 6a.                                                                                                         | 17 |
| Figure S26. <sup>1</sup> H-NMR of compound 6b in DMSO- <i>d</i> <sub>6</sub> .                                                                              | 18 |
| Figure S27. <sup>1</sup> H-NMR of compound 11 in DMSO- <i>d</i> <sub>6</sub> .                                                                              | 19 |
| Figure S28. MALDI-TOF mass spectrum of compound 11.                                                                                                         | 19 |
| Figure S29. <sup>1</sup> H-NMR of compound 12 in DMSO- <i>d</i> <sub>6</sub> .                                                                              | 20 |
| Figure S30. MALDI-TOF mass spectrum of compound 12.                                                                                                         | 20 |

Figure S1. Phosphorescence spectra of 1d and 2d in methylcyclohexane at 77 K

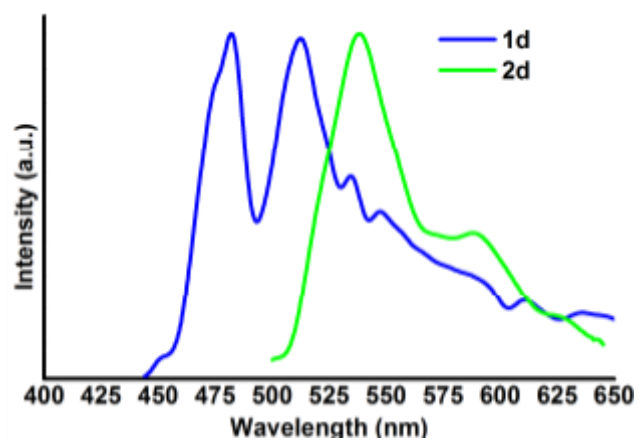

Figure S2. Steady-state 3D fluorescence emission-excitation spectra of 1a (a), 2a (b), 1b (c), 2b (d), 1c (e) and 2c (f) and their projections in methylcyclohexane at 298 K.

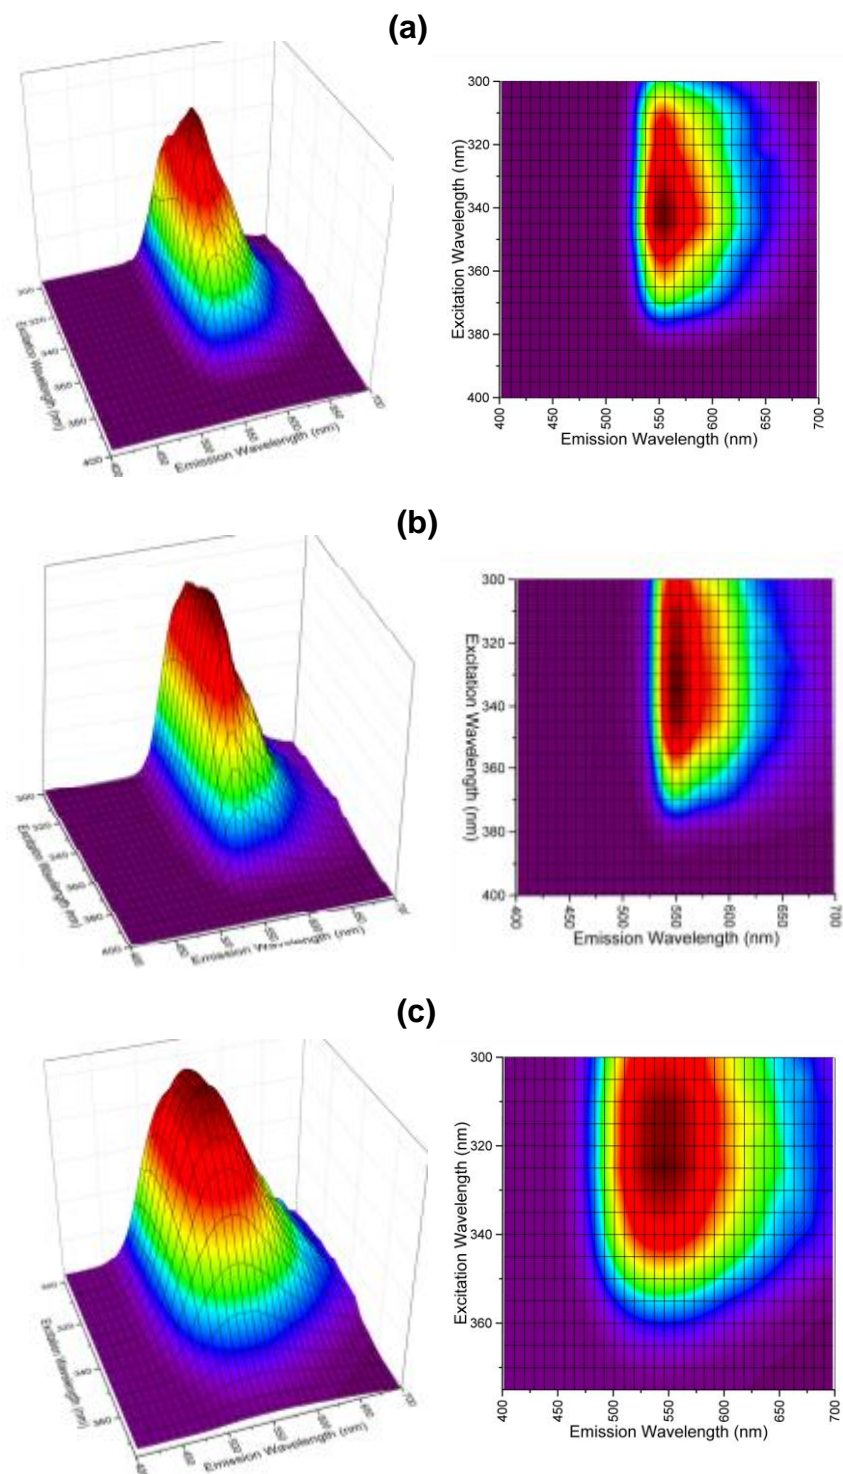

Figure S2. Continued

(d)

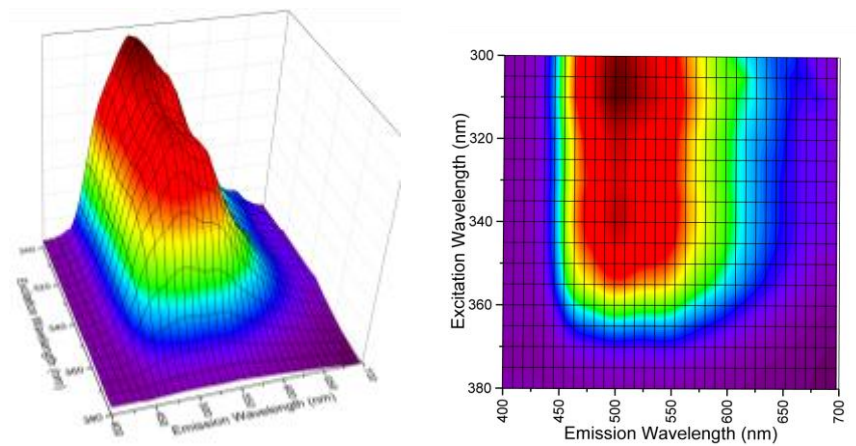

(e)

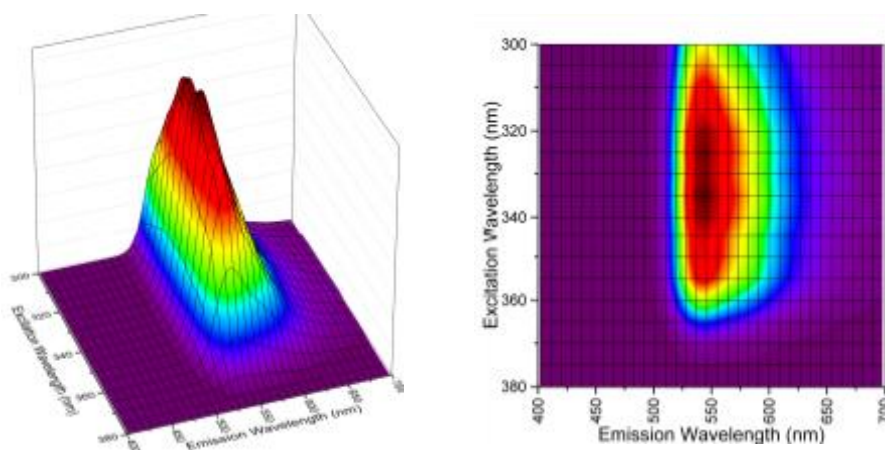

(f)

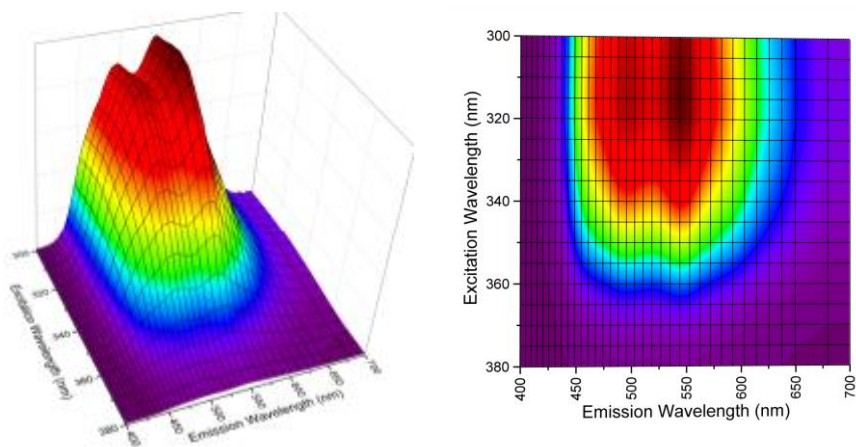

Figure S3. Absorption spectra at 298 K, steady-state fluorescence excitation spectra recorded at the emission maxima at 298 K and 77 K of 1a (a), 2a (b), 1b (c), 2b (d), 1c (e) and 2c (f) in methylcyclohexane.

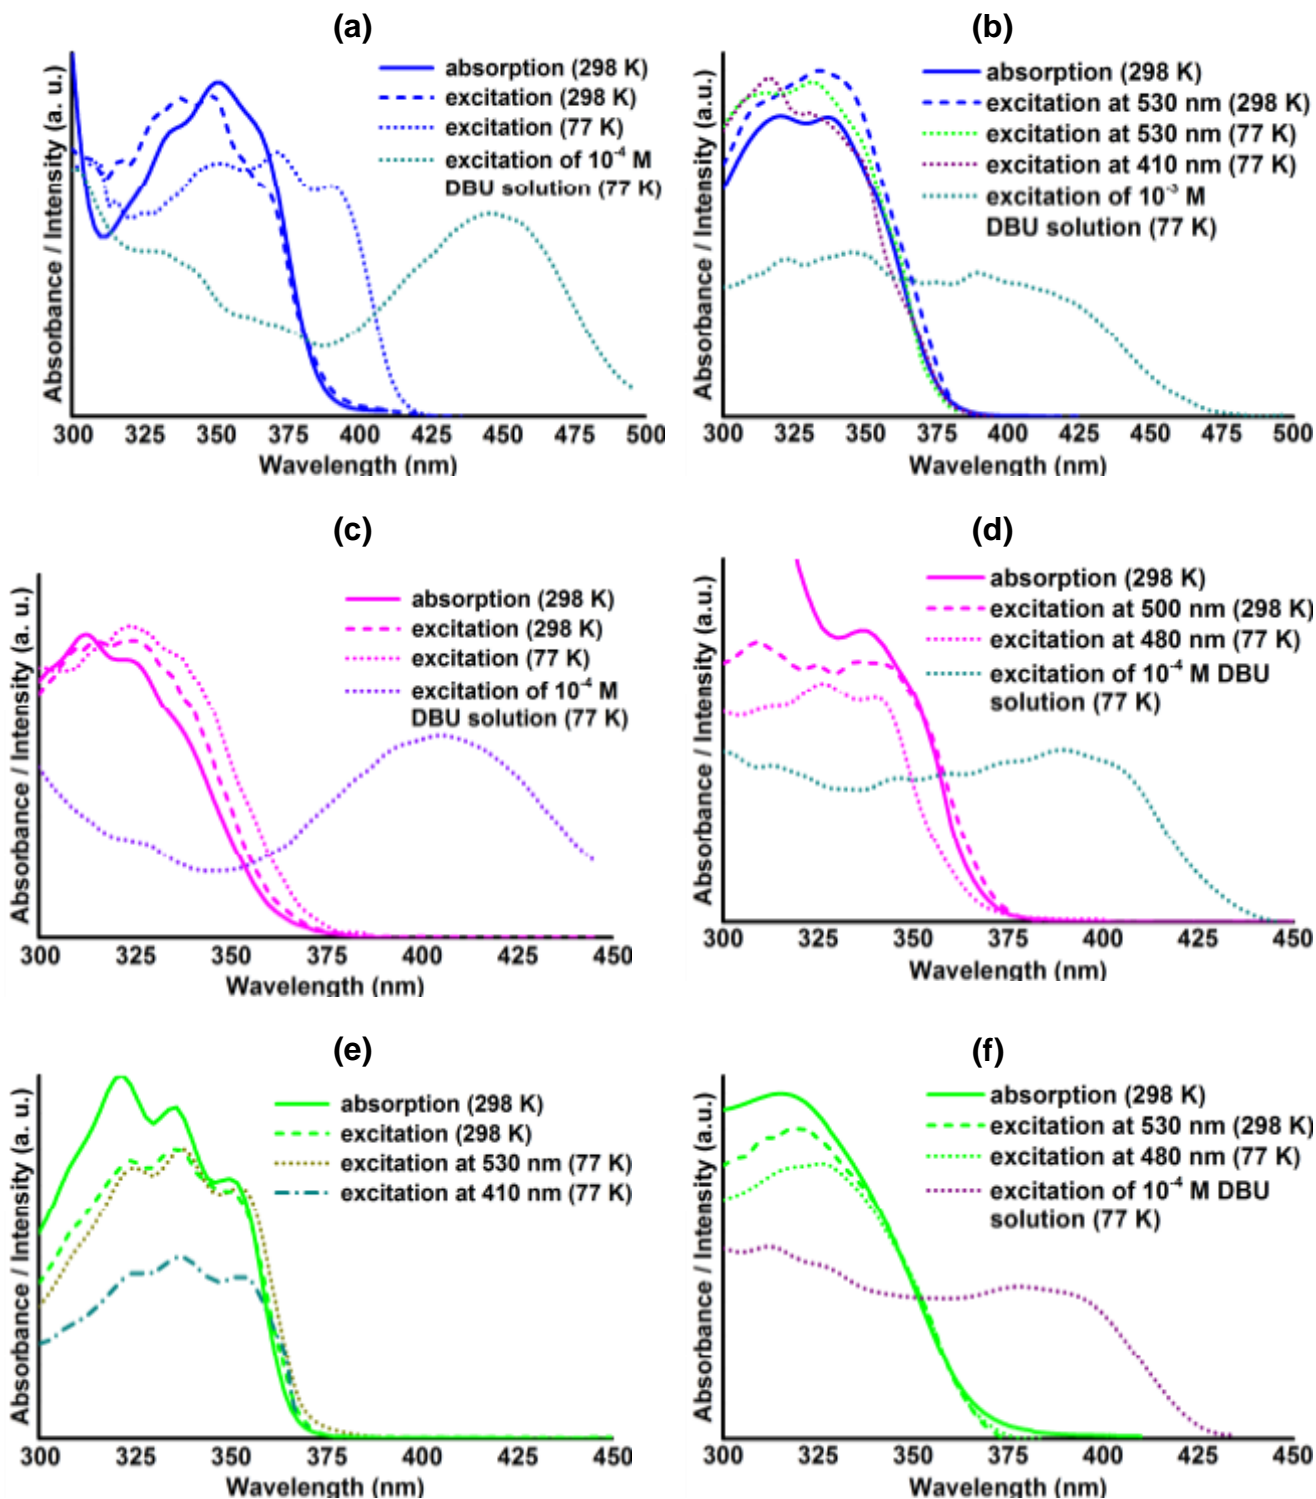

# <sup>1</sup>H-NMR and mass spectra of new compounds

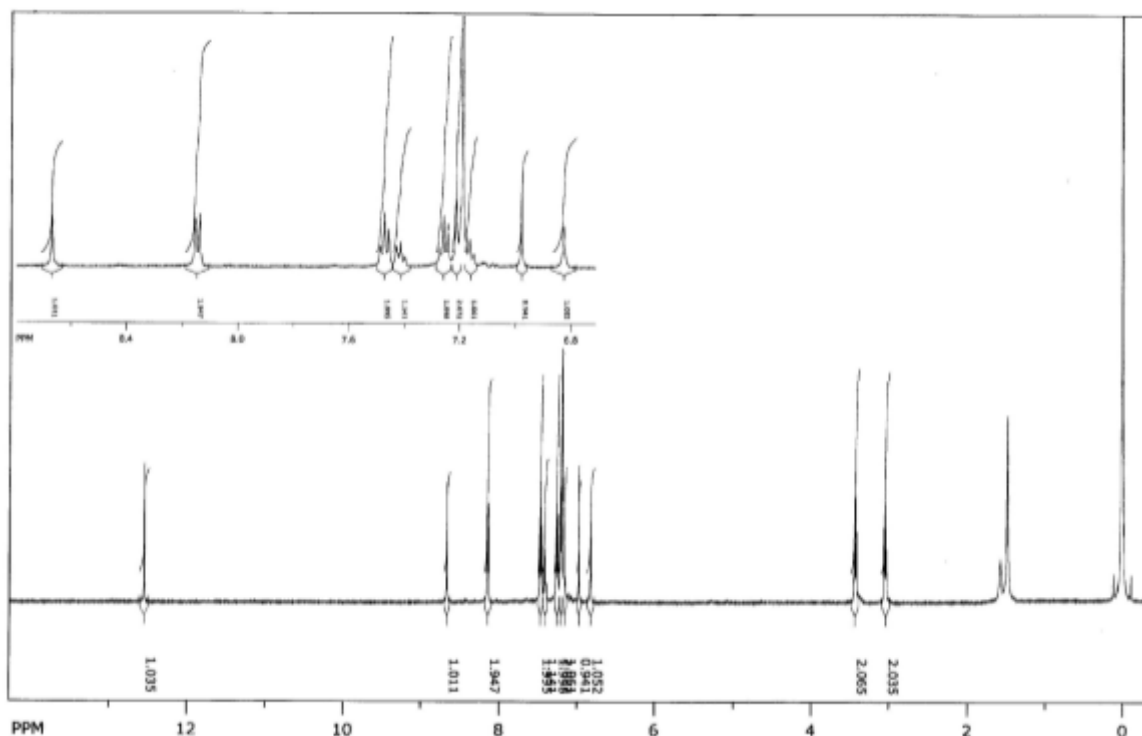

Figure S4. <sup>1</sup>H-NMR of compound 1a in CDCl<sub>3</sub>.

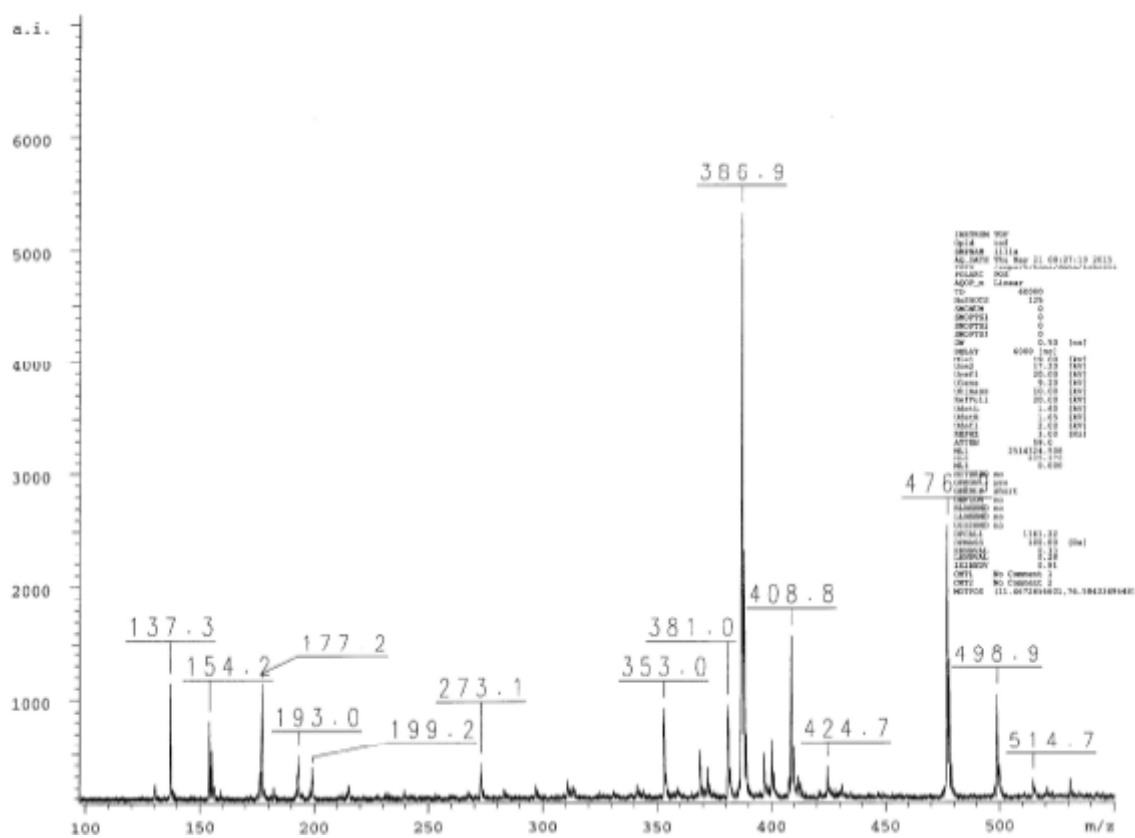

Figure S5. MALDI-TOF mass spectrum of compound 1a.





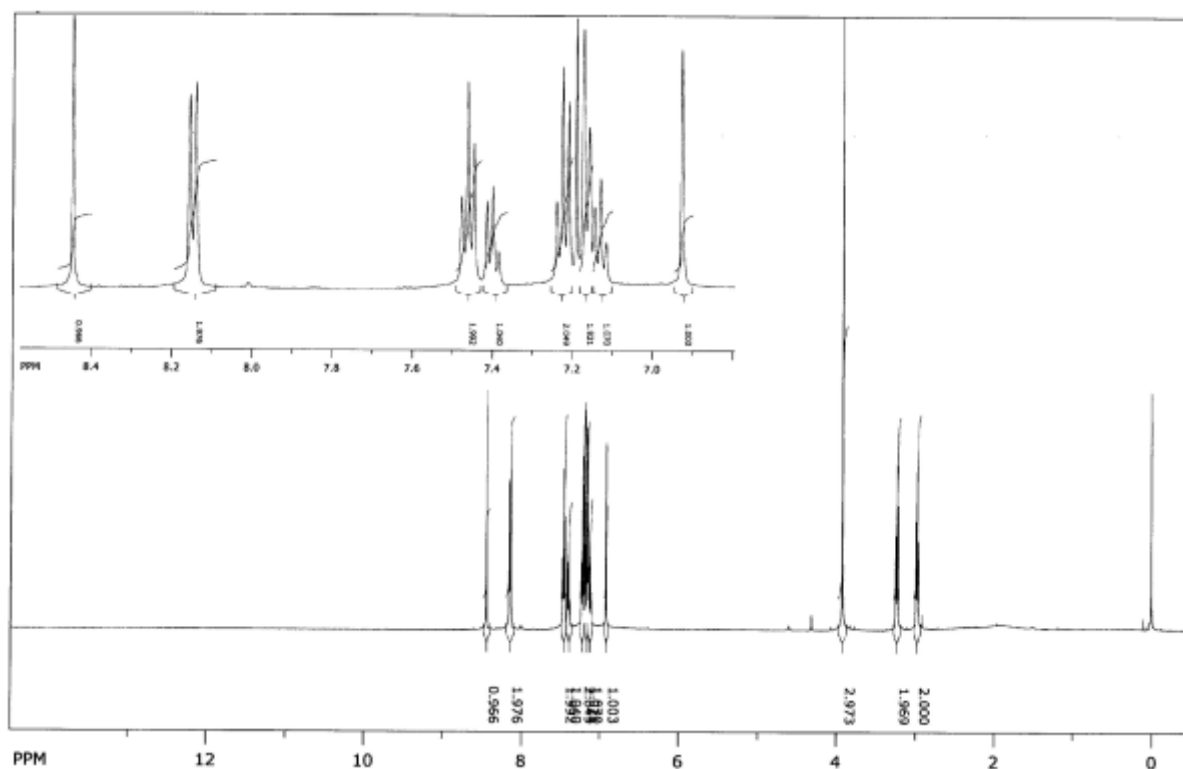

Figure S8. <sup>1</sup>H-NMR of compound 1c in CDCl<sub>3</sub>.

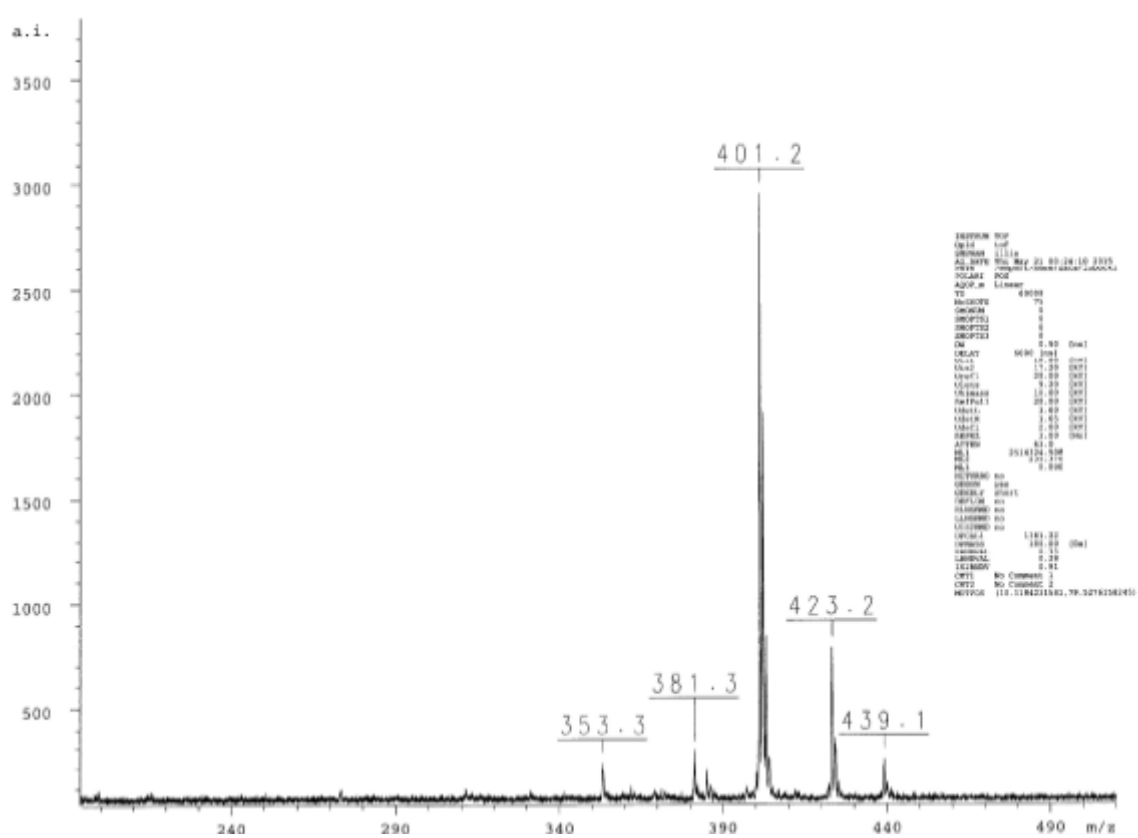

Figure S9. MALDI-TOF mass spectrum of compound 1c.







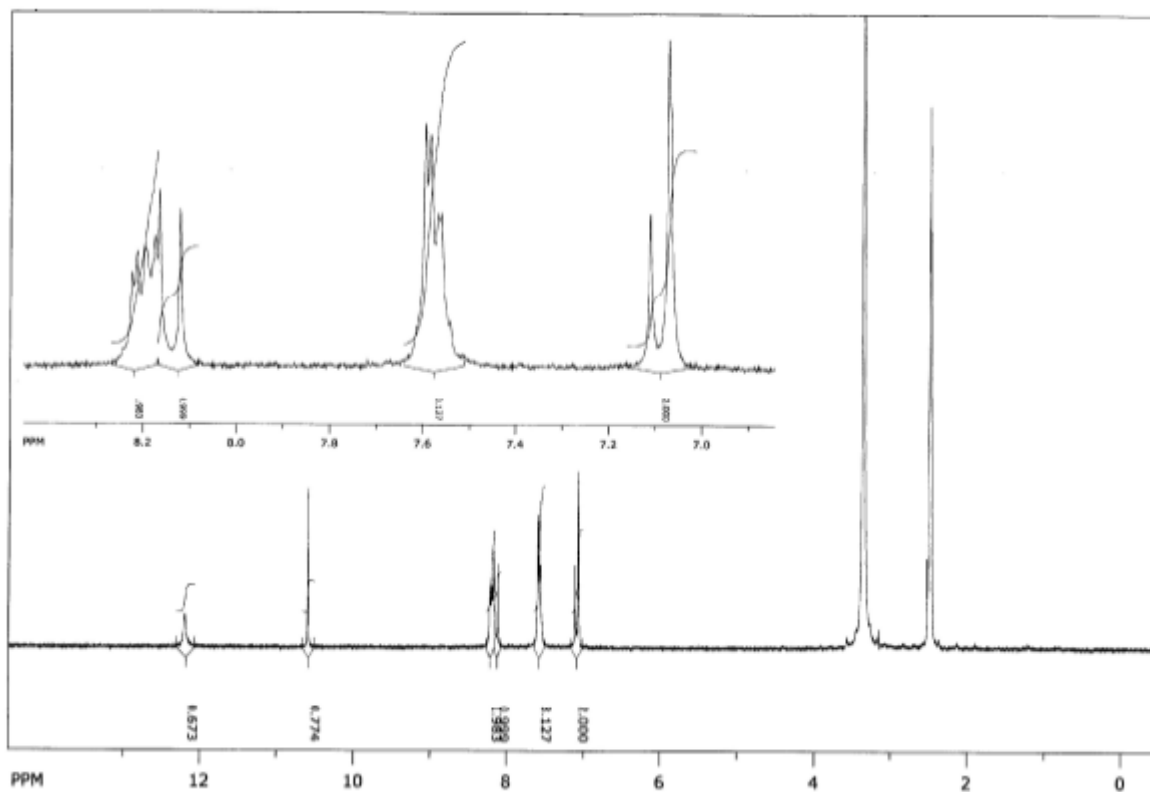

Figure S16.  $^1\text{H-NMR}$  of compound 2b in  $\text{DMSO-}d_6$ .

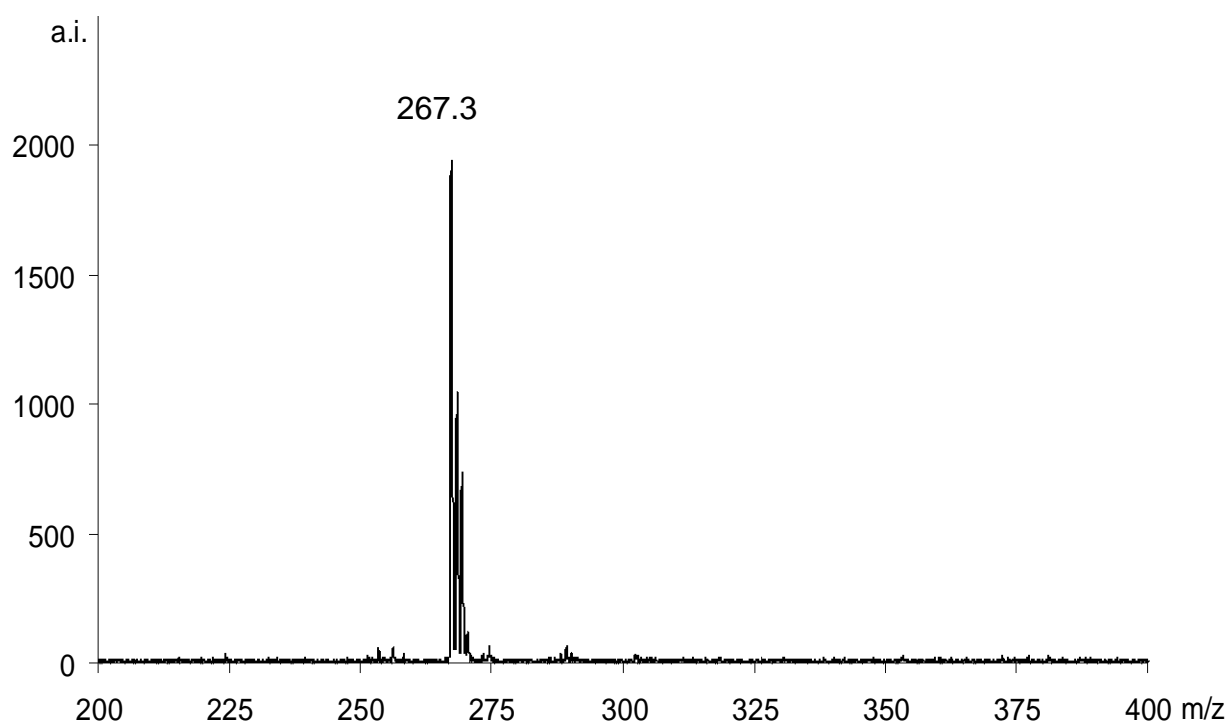

Figure S17. MALDI-TOF mass spectrum of compound 2b.

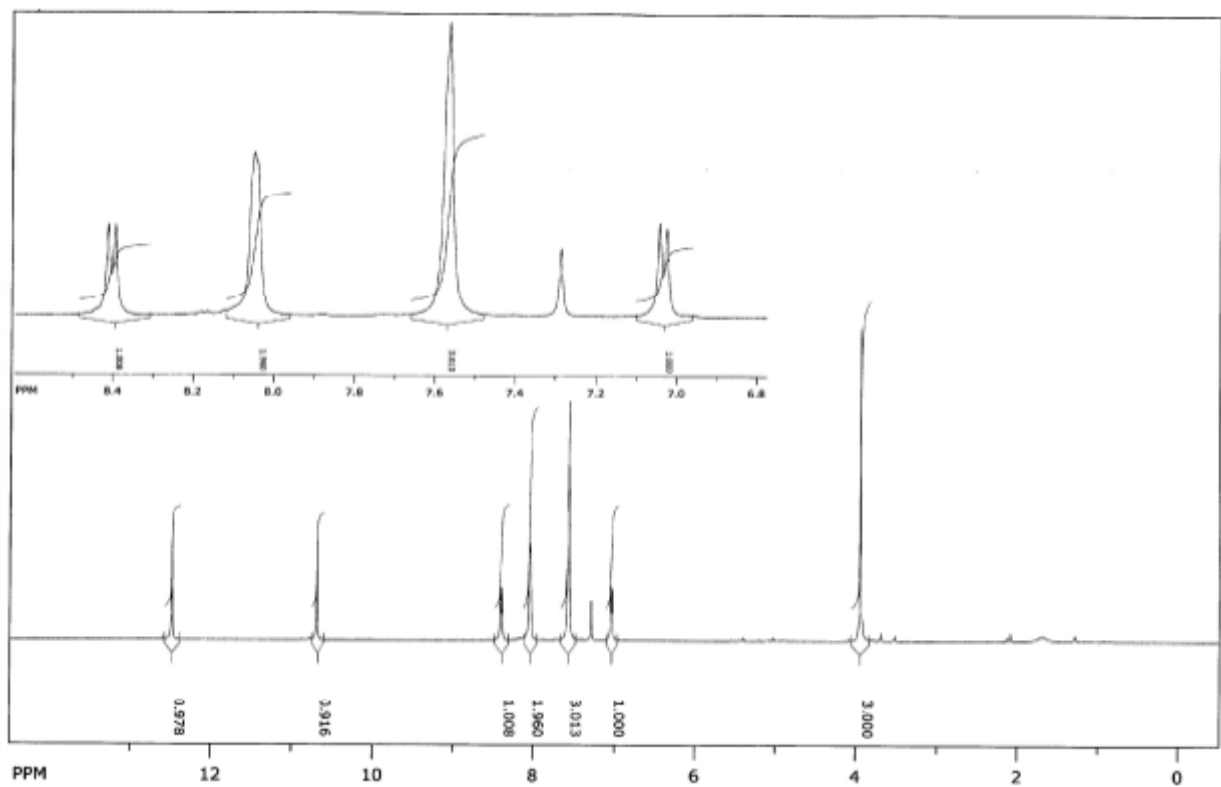

Figure S18.  $^1\text{H-NMR}$  of compound 2c in  $\text{CDCl}_3$ .

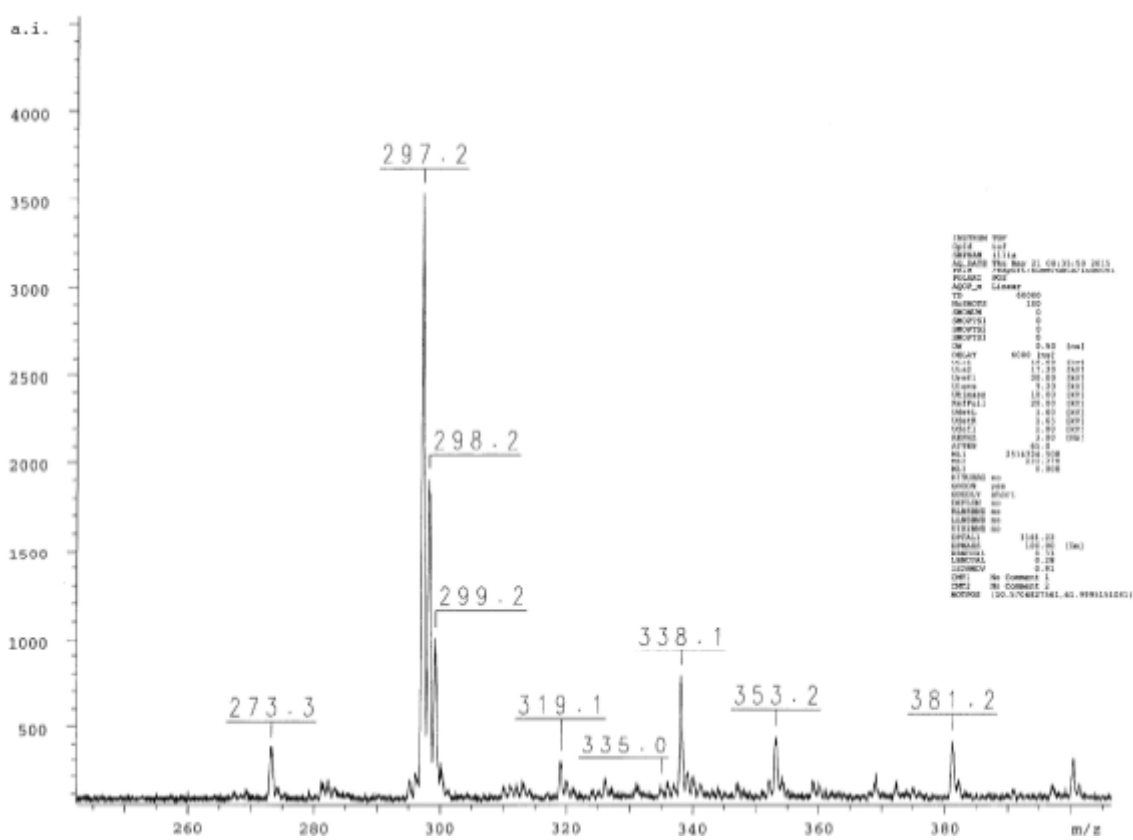

Figure S19. MALDI-TOF mass spectrum of compound 2c.

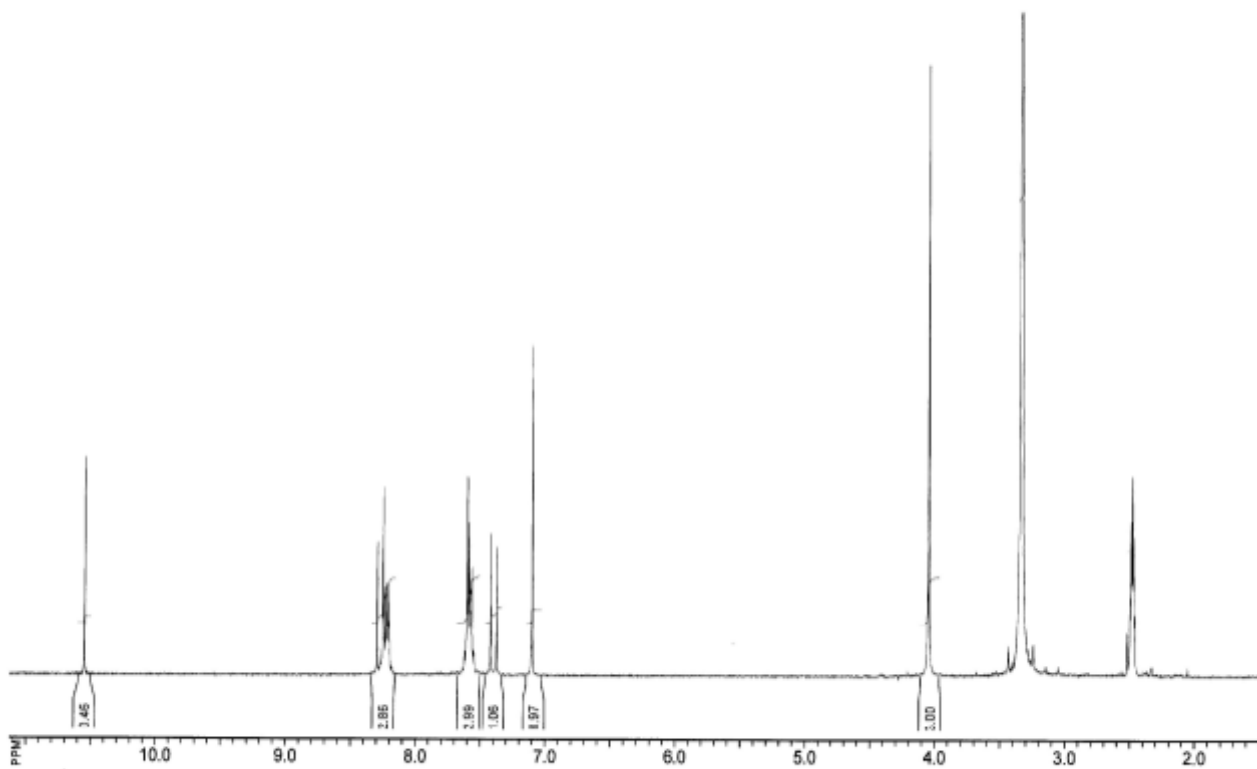

Figure S20.  $^1\text{H-NMR}$  of compound 2d in  $\text{DMSO-}d_6$ .

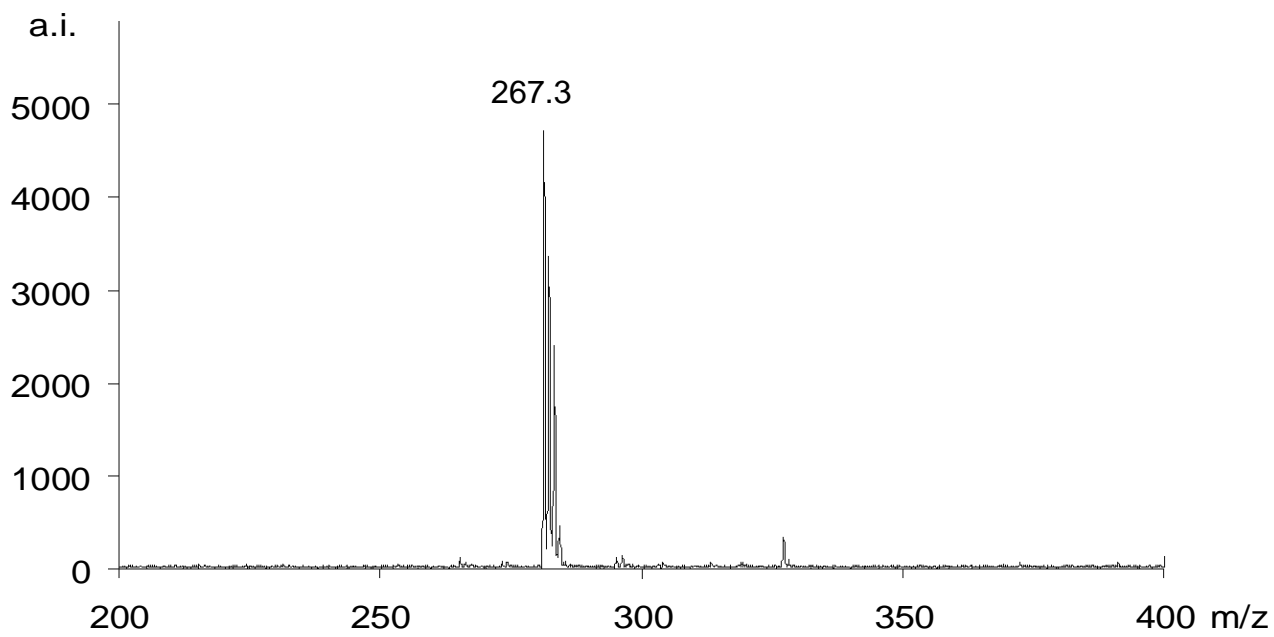

Figure S21. MALDI-TOF mass spectrum of compound 2d.

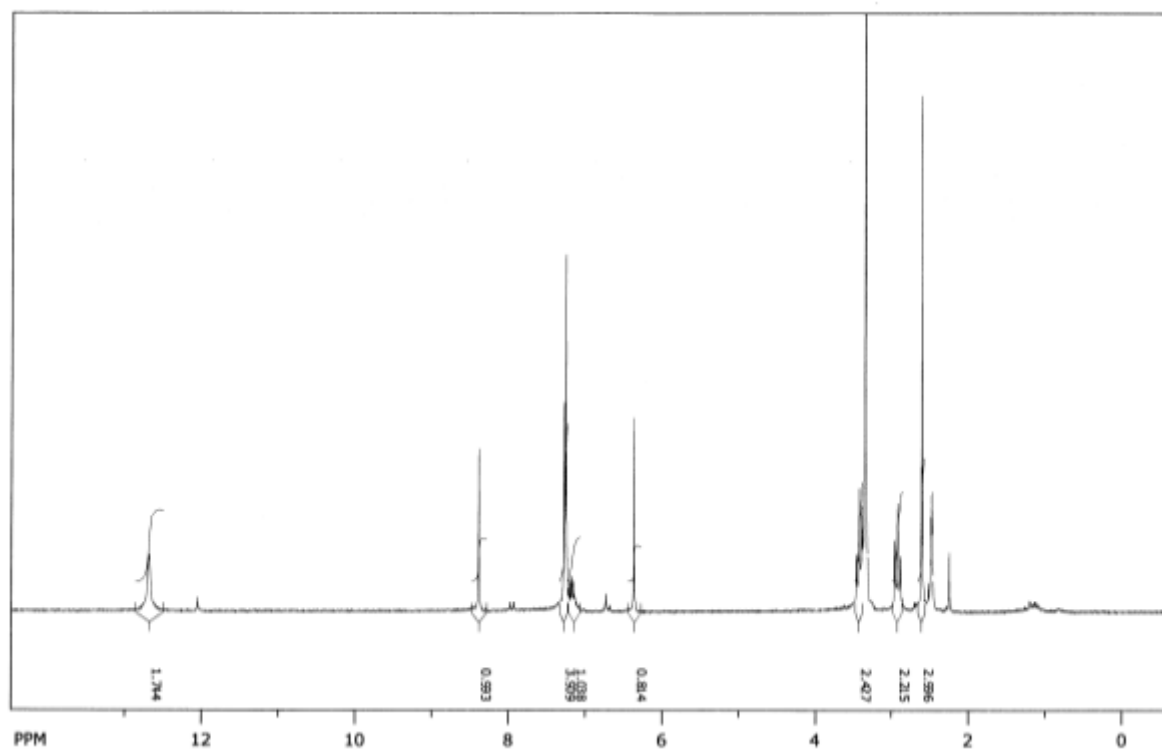

Figure S22. <sup>1</sup>H-NMR of compound 5a in DMSO-d<sub>6</sub>.

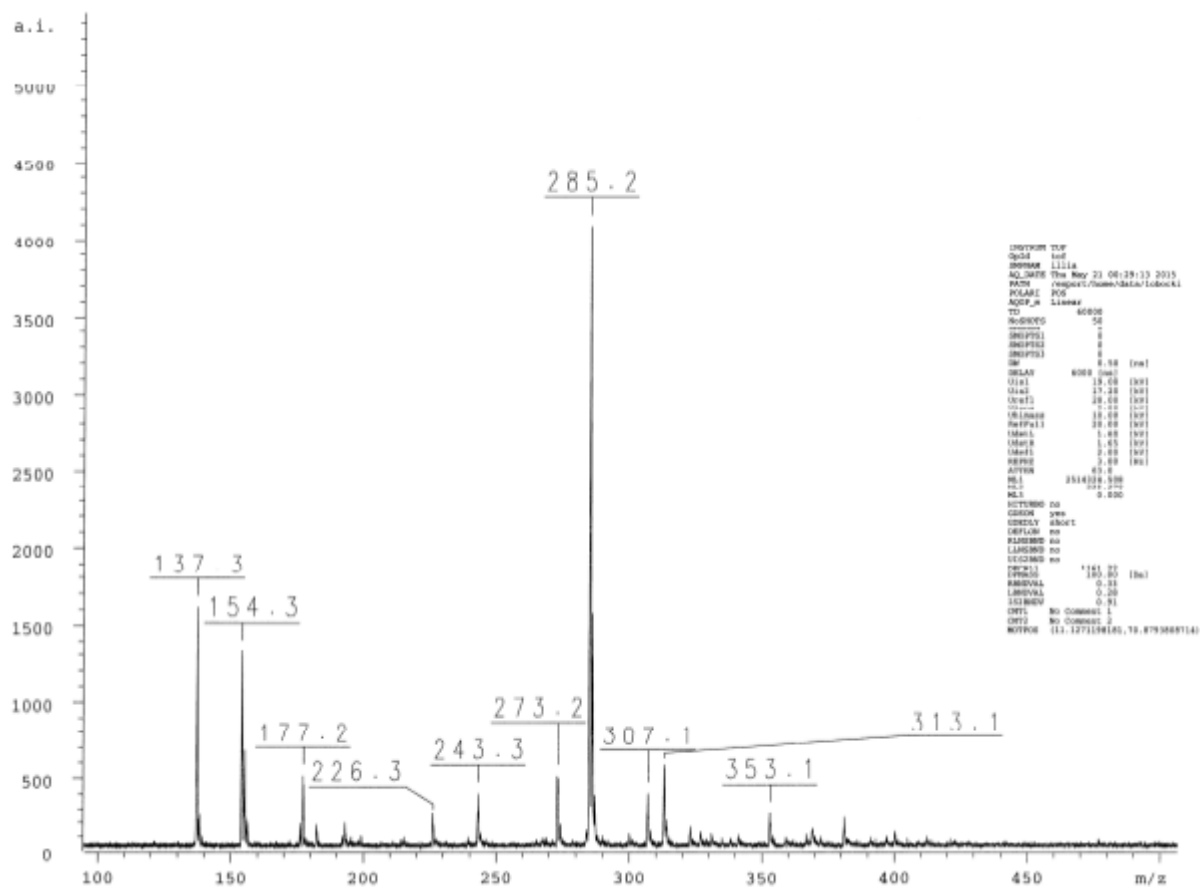

Figure S23. MALDI-TOF mass spectrum of compound 5a.





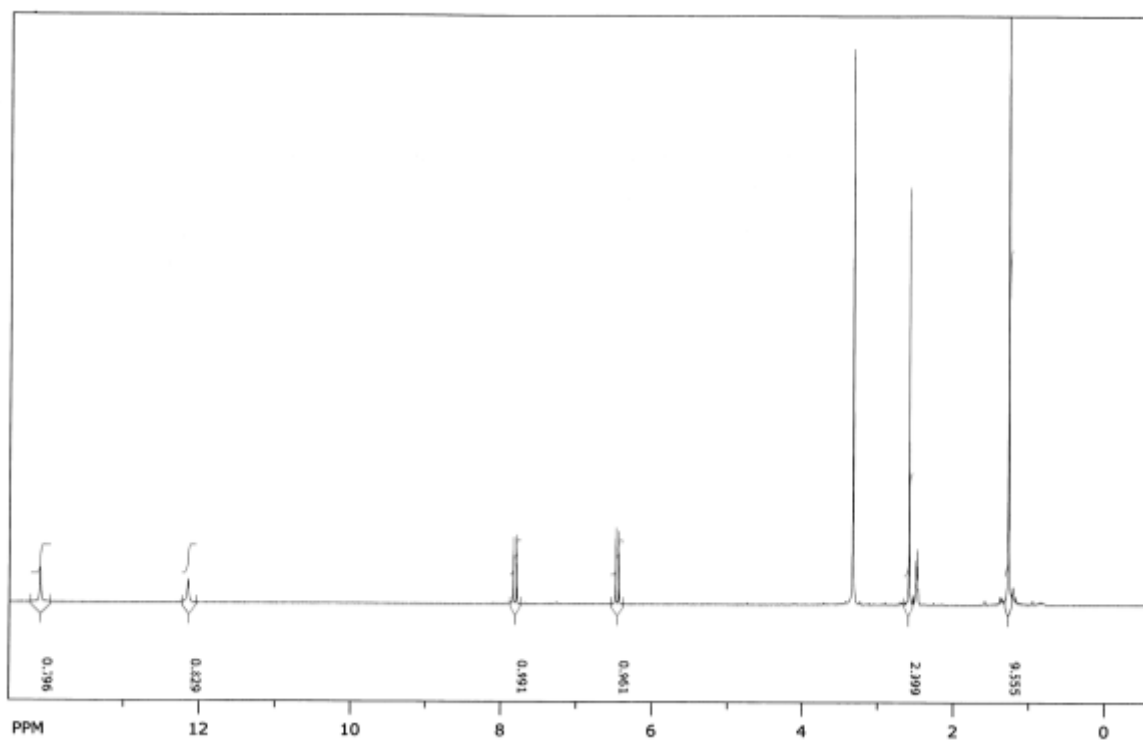

Figure S26. <sup>1</sup>H-NMR of compound 6b in DMSO-d<sub>6</sub>.

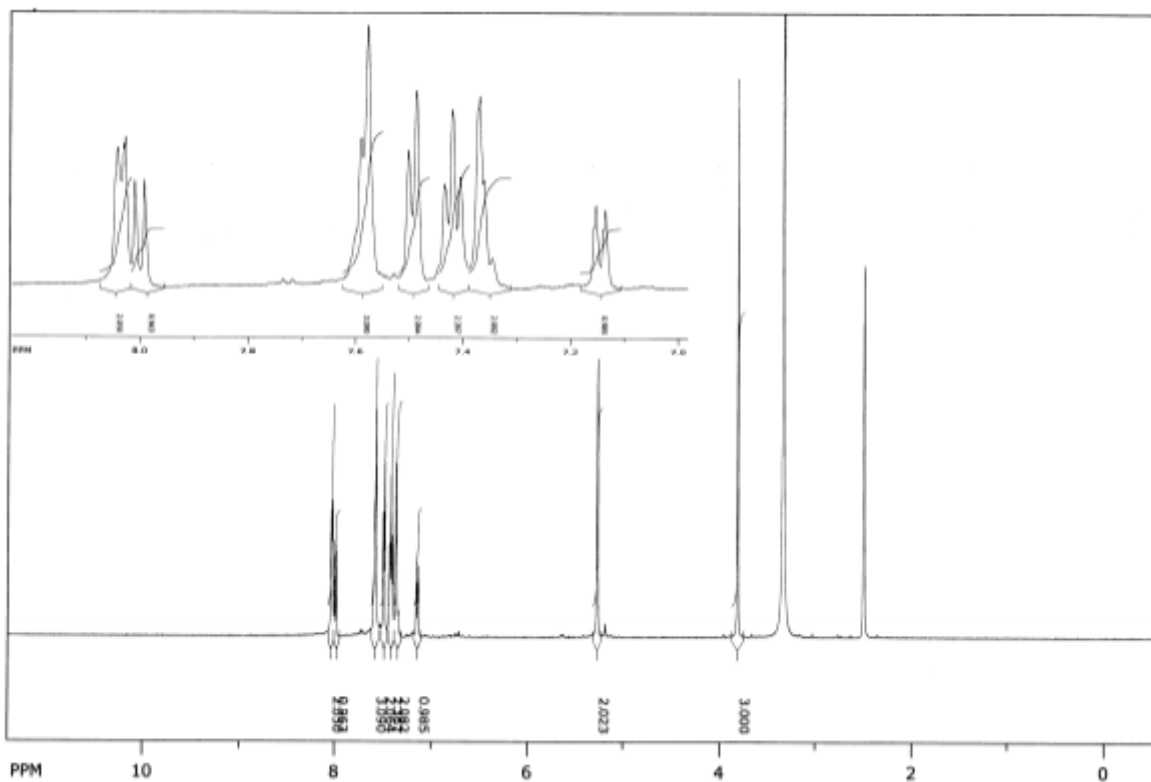

Figure S27.  $^1\text{H-NMR}$  of compound 11 in  $\text{DMSO-}d_6$ .

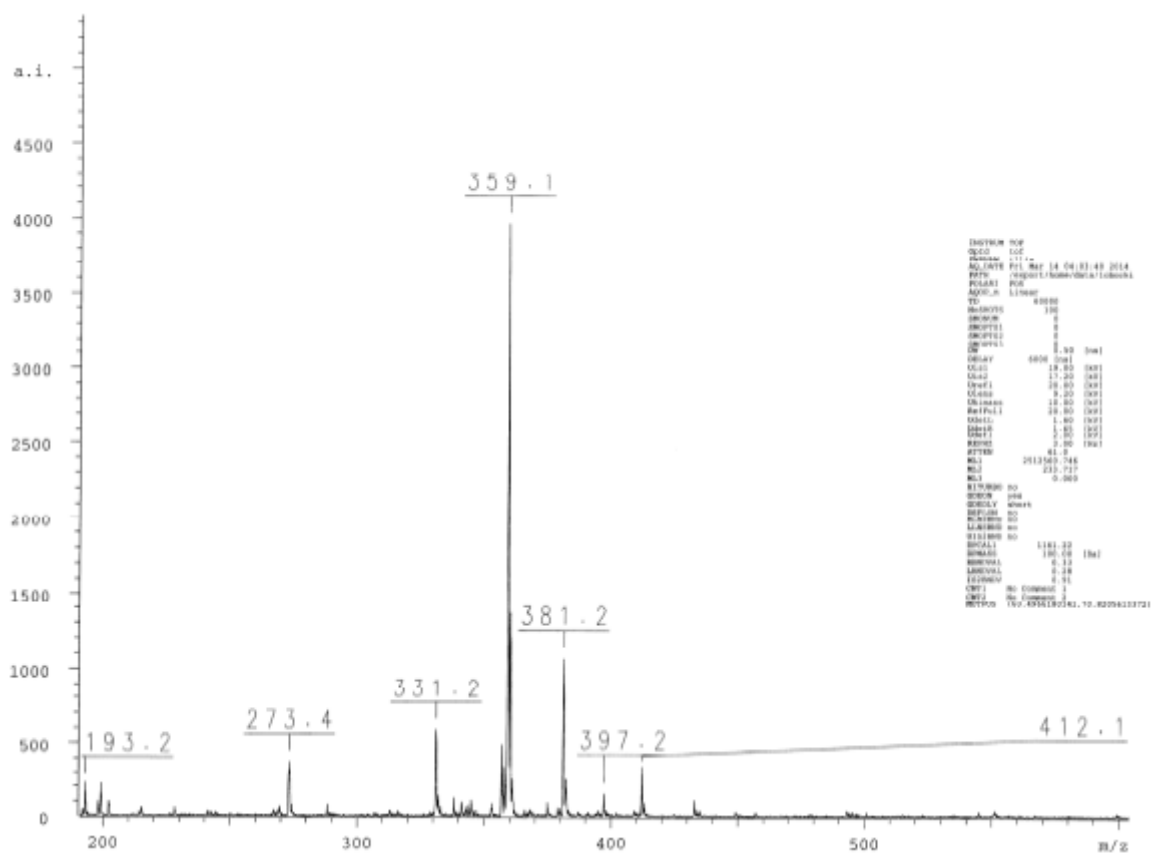

Figure S28. MALDI-TOF mass spectrum of compound 11.

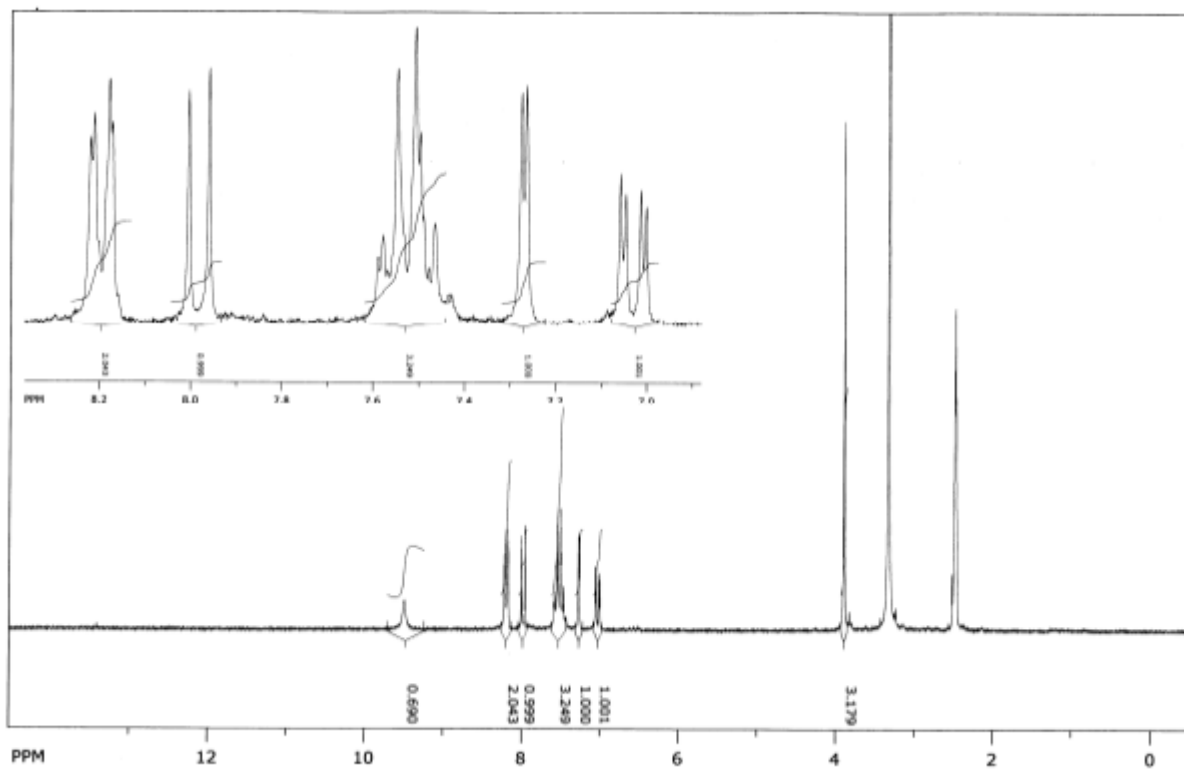

Figure S29. <sup>1</sup>H-NMR of compound 12 in DMSO-d<sub>6</sub>.

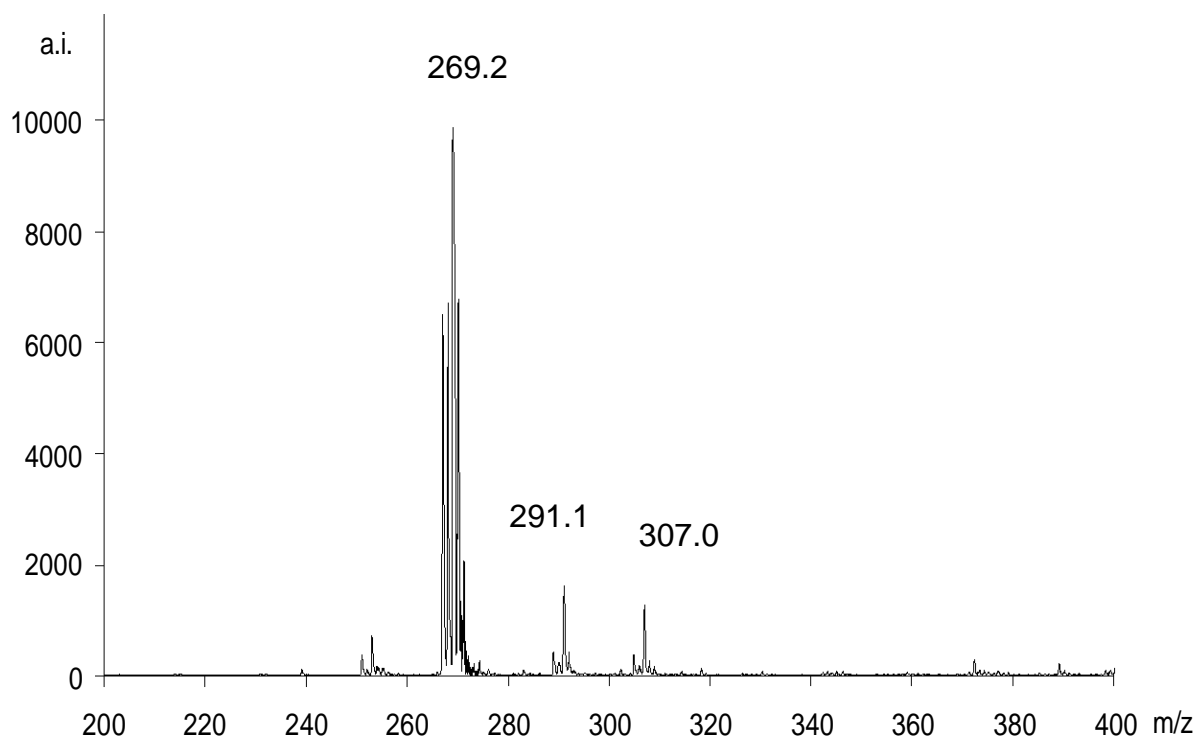

Figure S30. MALDI-TOF mass spectrum of compound 12.
